# Supplementary material for: Stereoselective inversion of γ-vinyl-γ-butyrolactone under palladium catalysis: application to the synthesis of (+)-exo- and (+)-endo-brevicomins
Source: Royal Society of Chemistry journal article supplement (doi:10.1039/c4ra00814f), 2014-01-01

## Supporting Information

### **Stereoselective inversion of $\gamma$ -vinyl- $\gamma$ -butyrolactone under palladium catalysis: Application to the synthesis of (+)-*exo*- and (+)-*endo*-brevicomins**

**Rodney A. Fernandes\***, Pullaiah Kattanguru and Venkati Bethi

*Department of Chemistry, Indian Institute of Technology Bombay, Powai,*

*Mumbai 400 076 Maharashtra, India. E-mail: rfernand@chem.iitb.ac.in*

#### Contents

Copies of  $^1\text{H}$  and  $^{13}\text{C}$  NMR spectra for all the compounds ..... S2–S17

<sup>1</sup>H NMR (400 MHz, CDCl<sub>3</sub>/TMS) of Compound **2a**

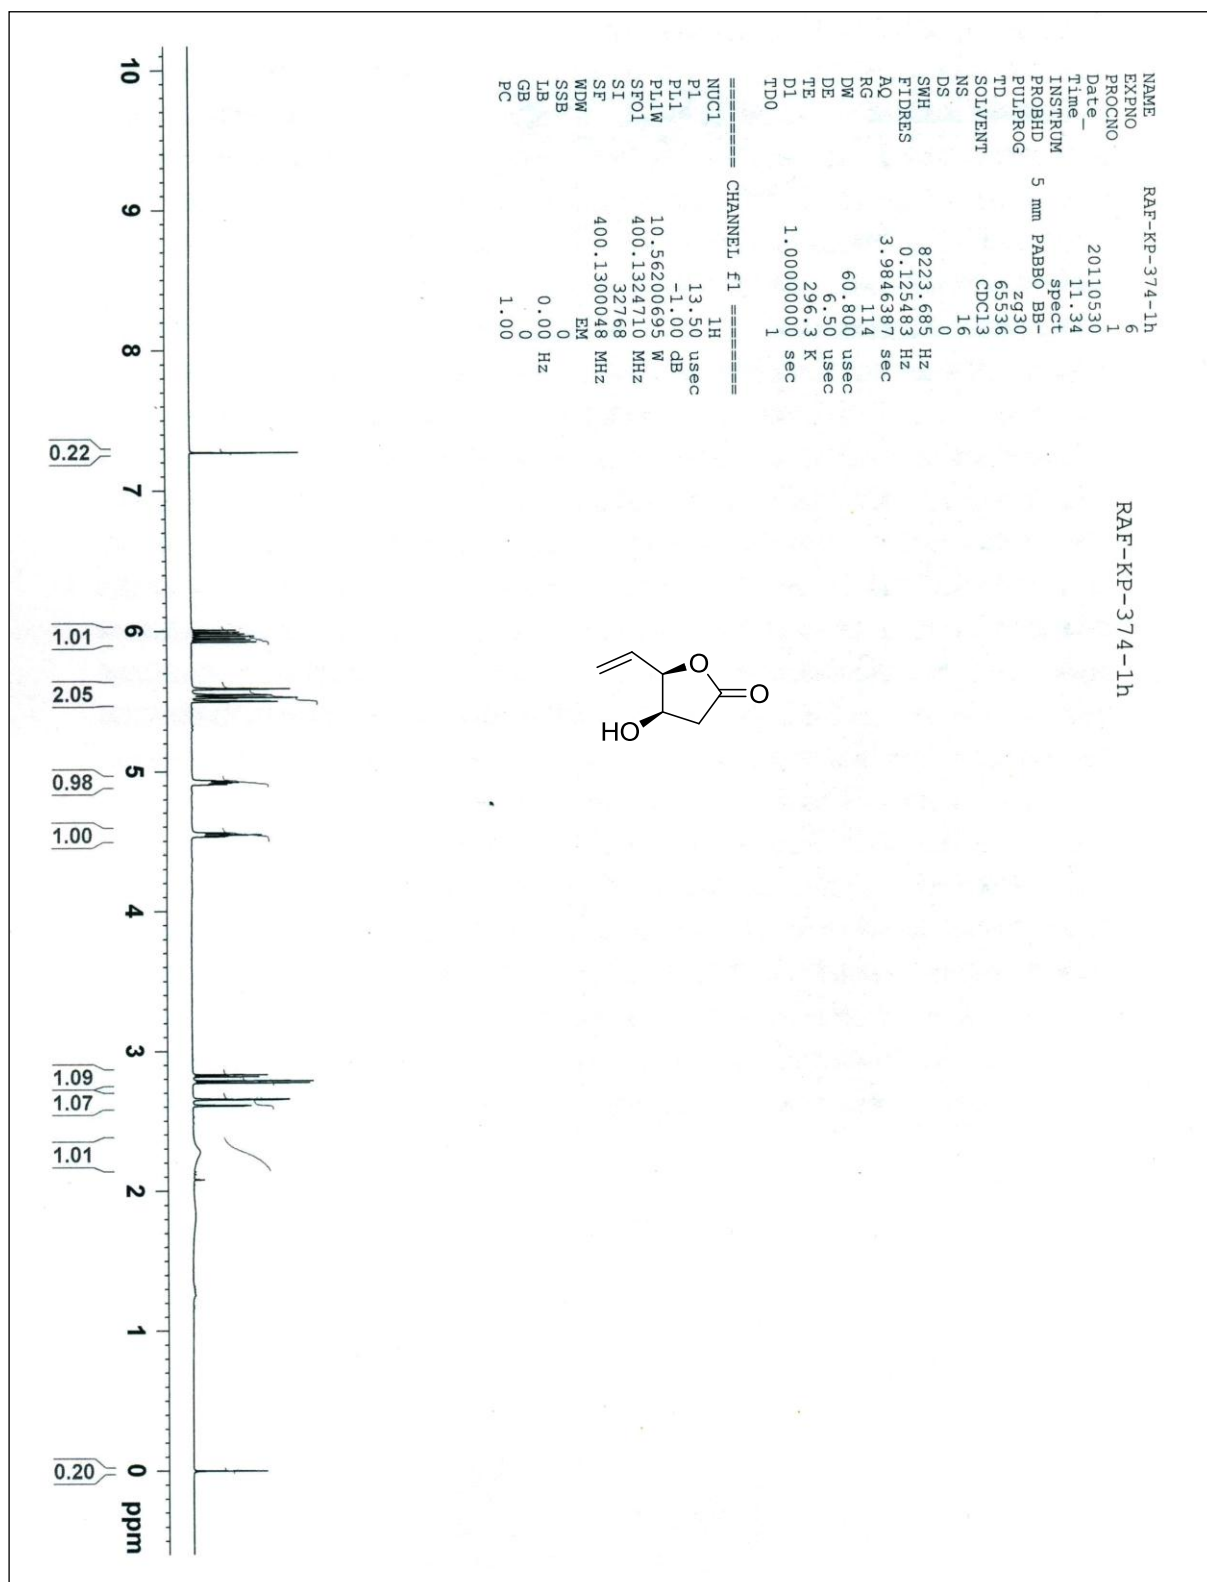

<sup>13</sup>C NMR (100 MHz, CDCl<sub>3</sub>) of Compound **2a**

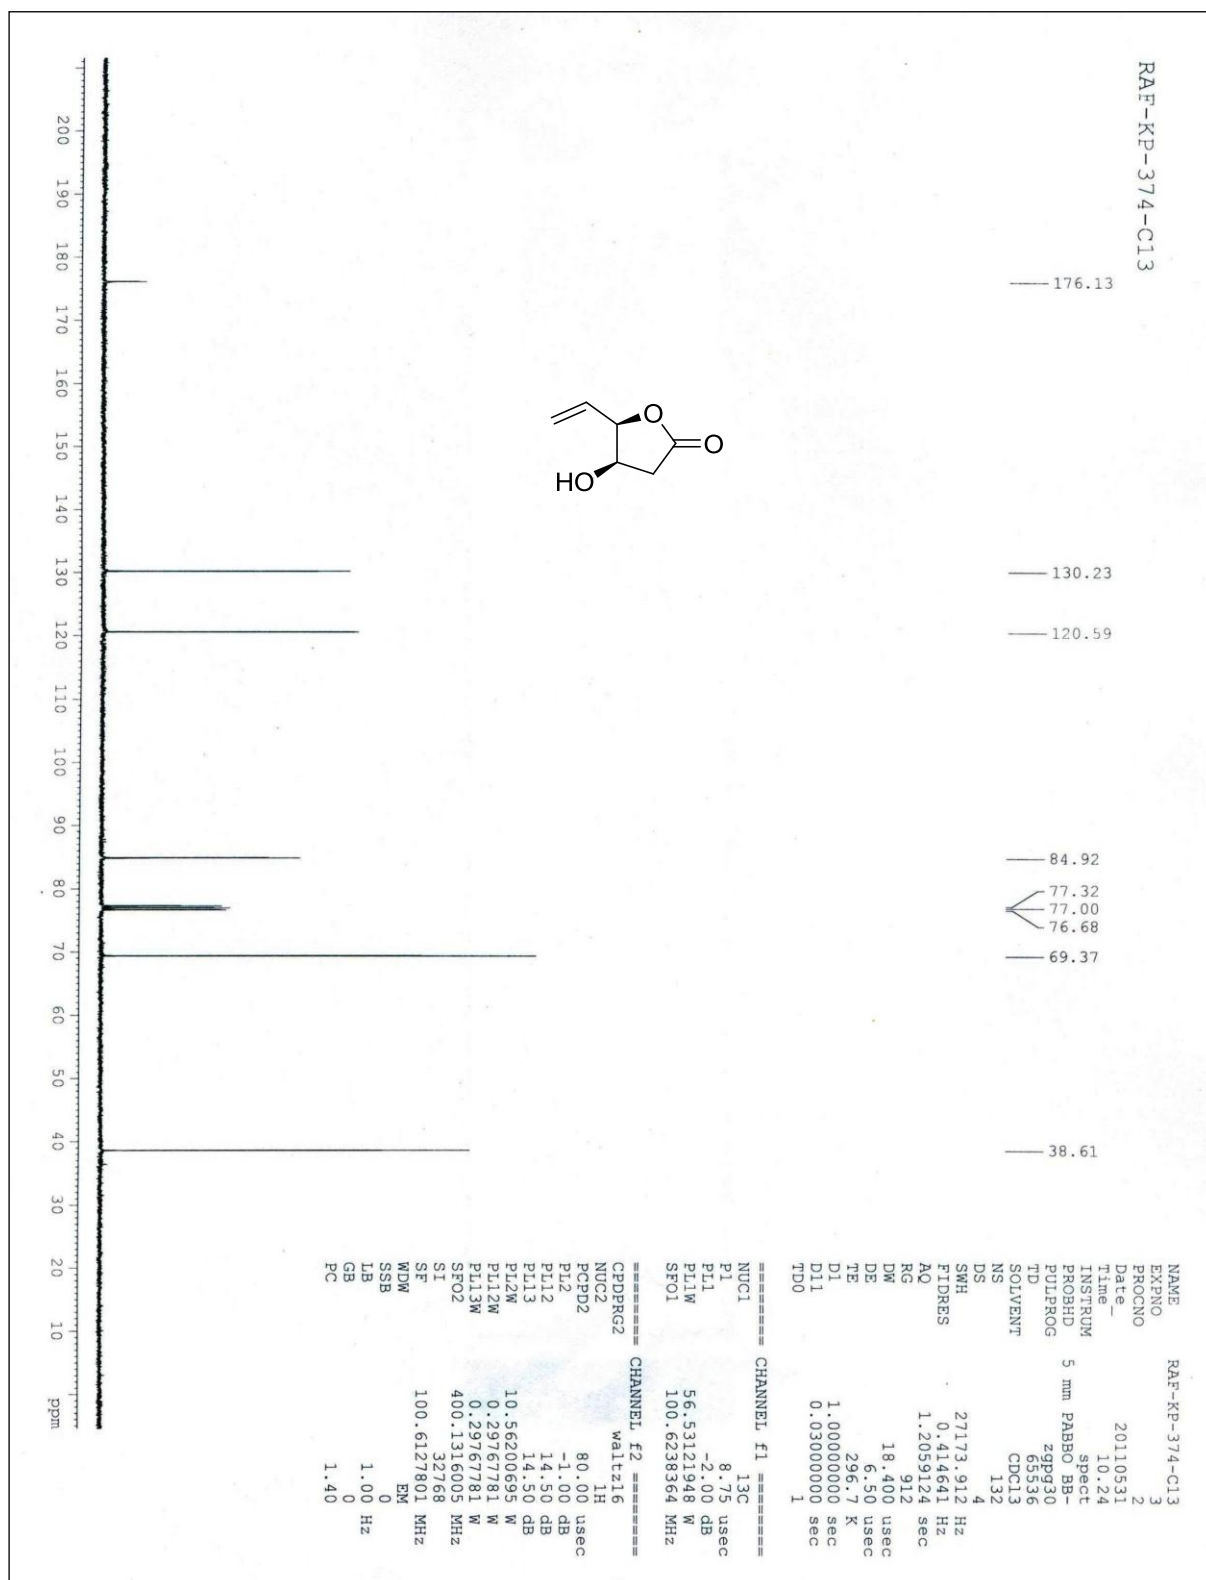

<sup>1</sup>H NMR (400 MHz, CDCl<sub>3</sub>/TMS) of Compound **1a**

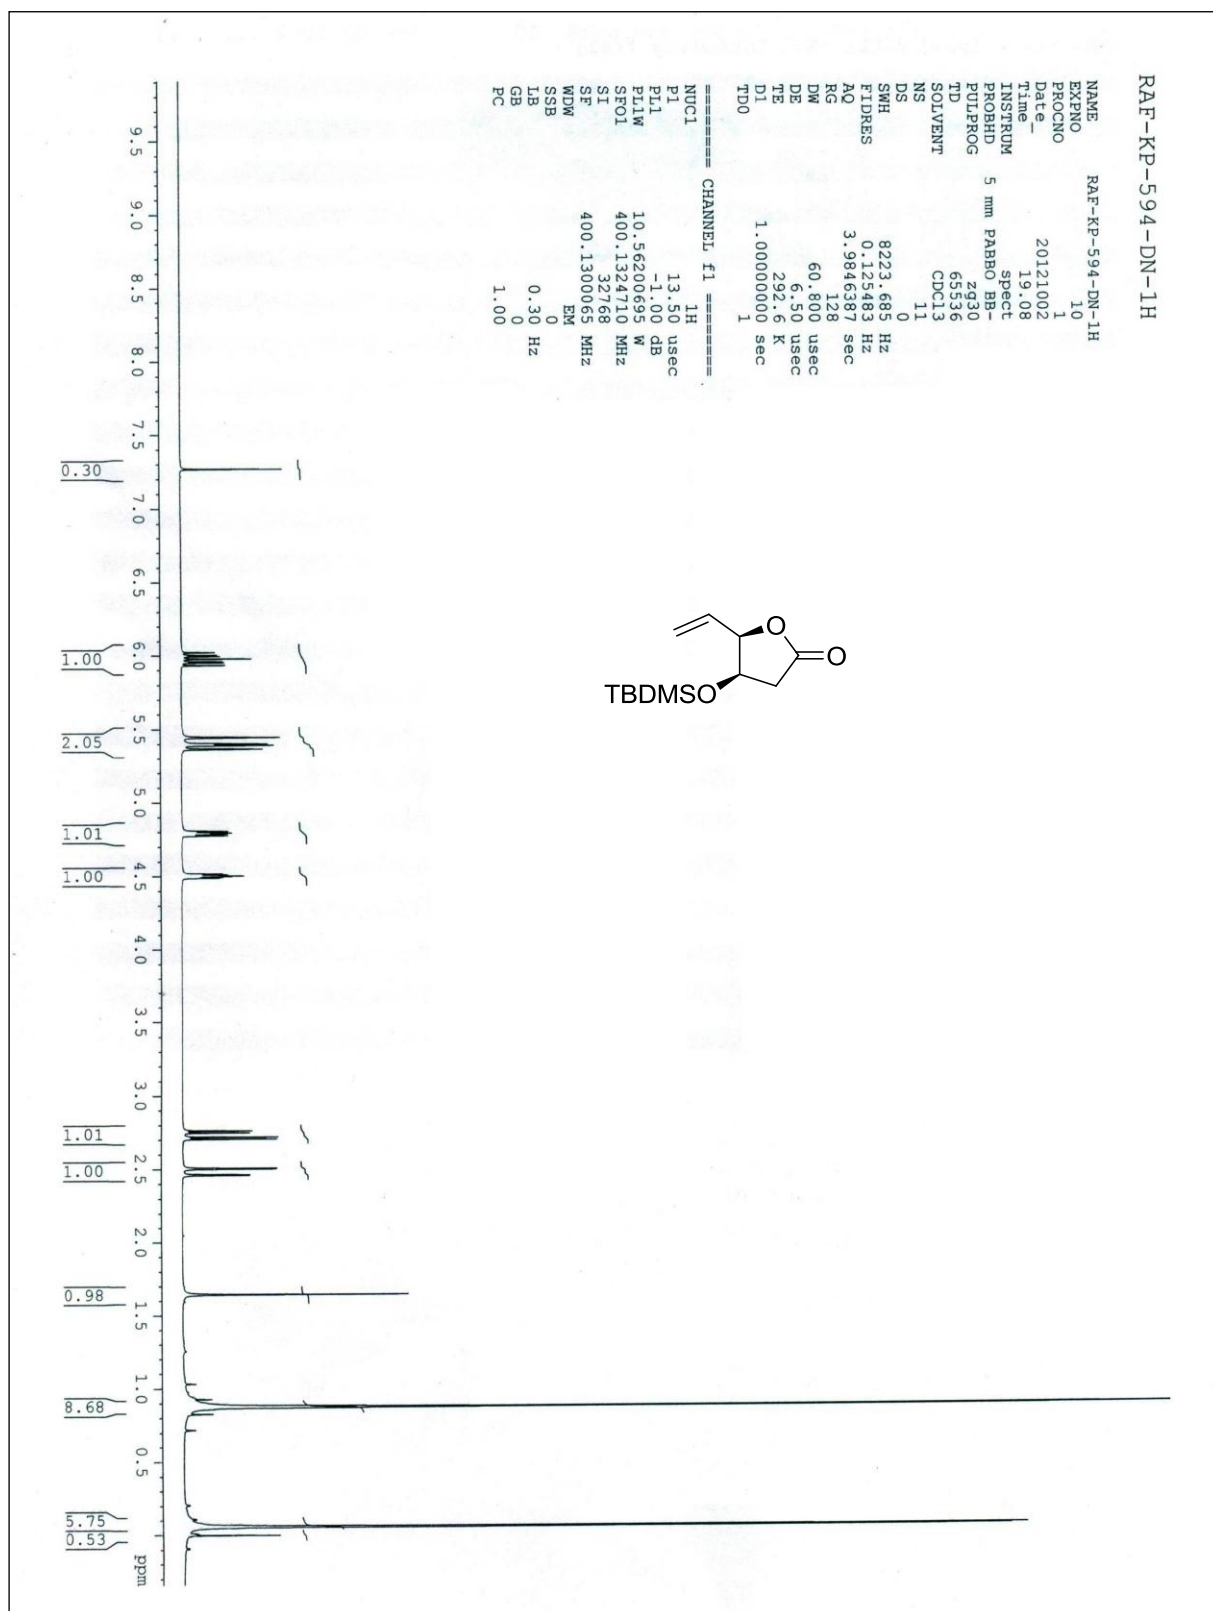

<sup>13</sup>C NMR (100 MHz, CDCl<sub>3</sub>) of Compound **1a**

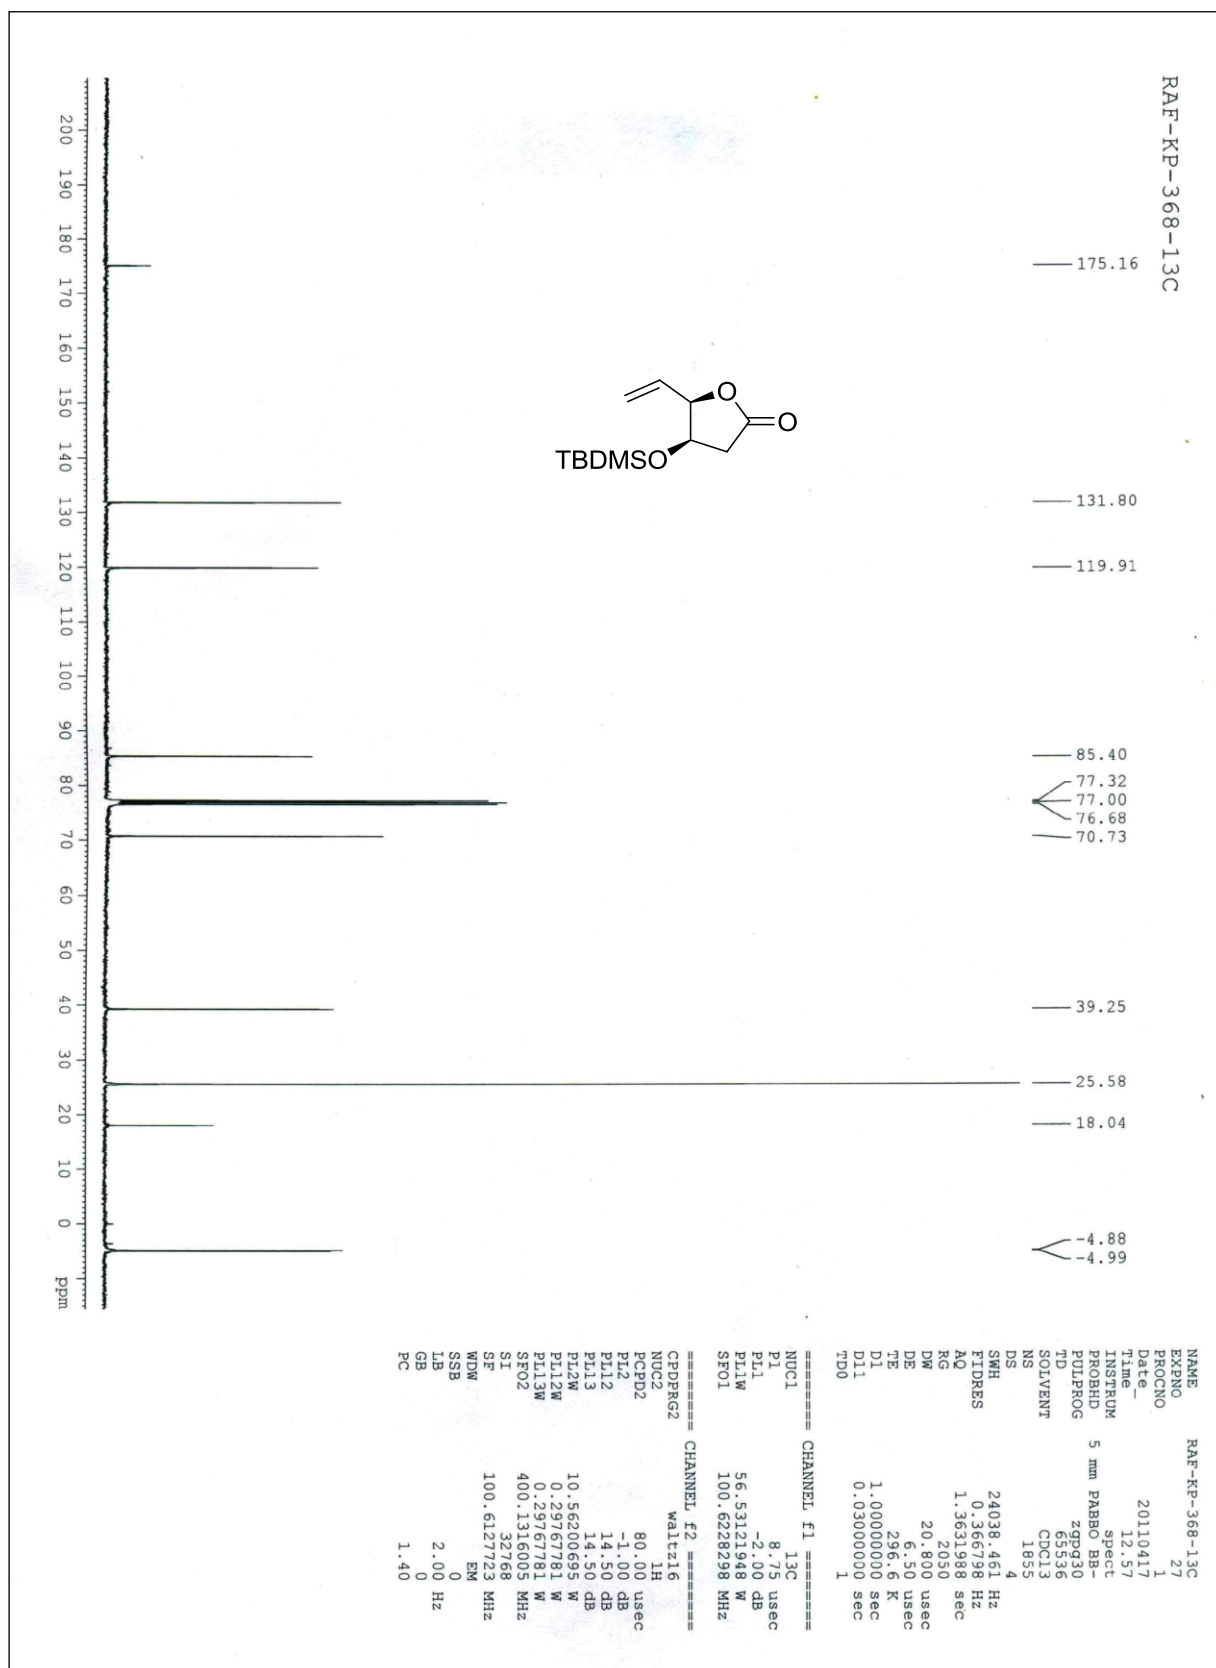

<sup>1</sup>H NMR (400 MHz, CDCl<sub>3</sub>/TMS) of Compound **1b**

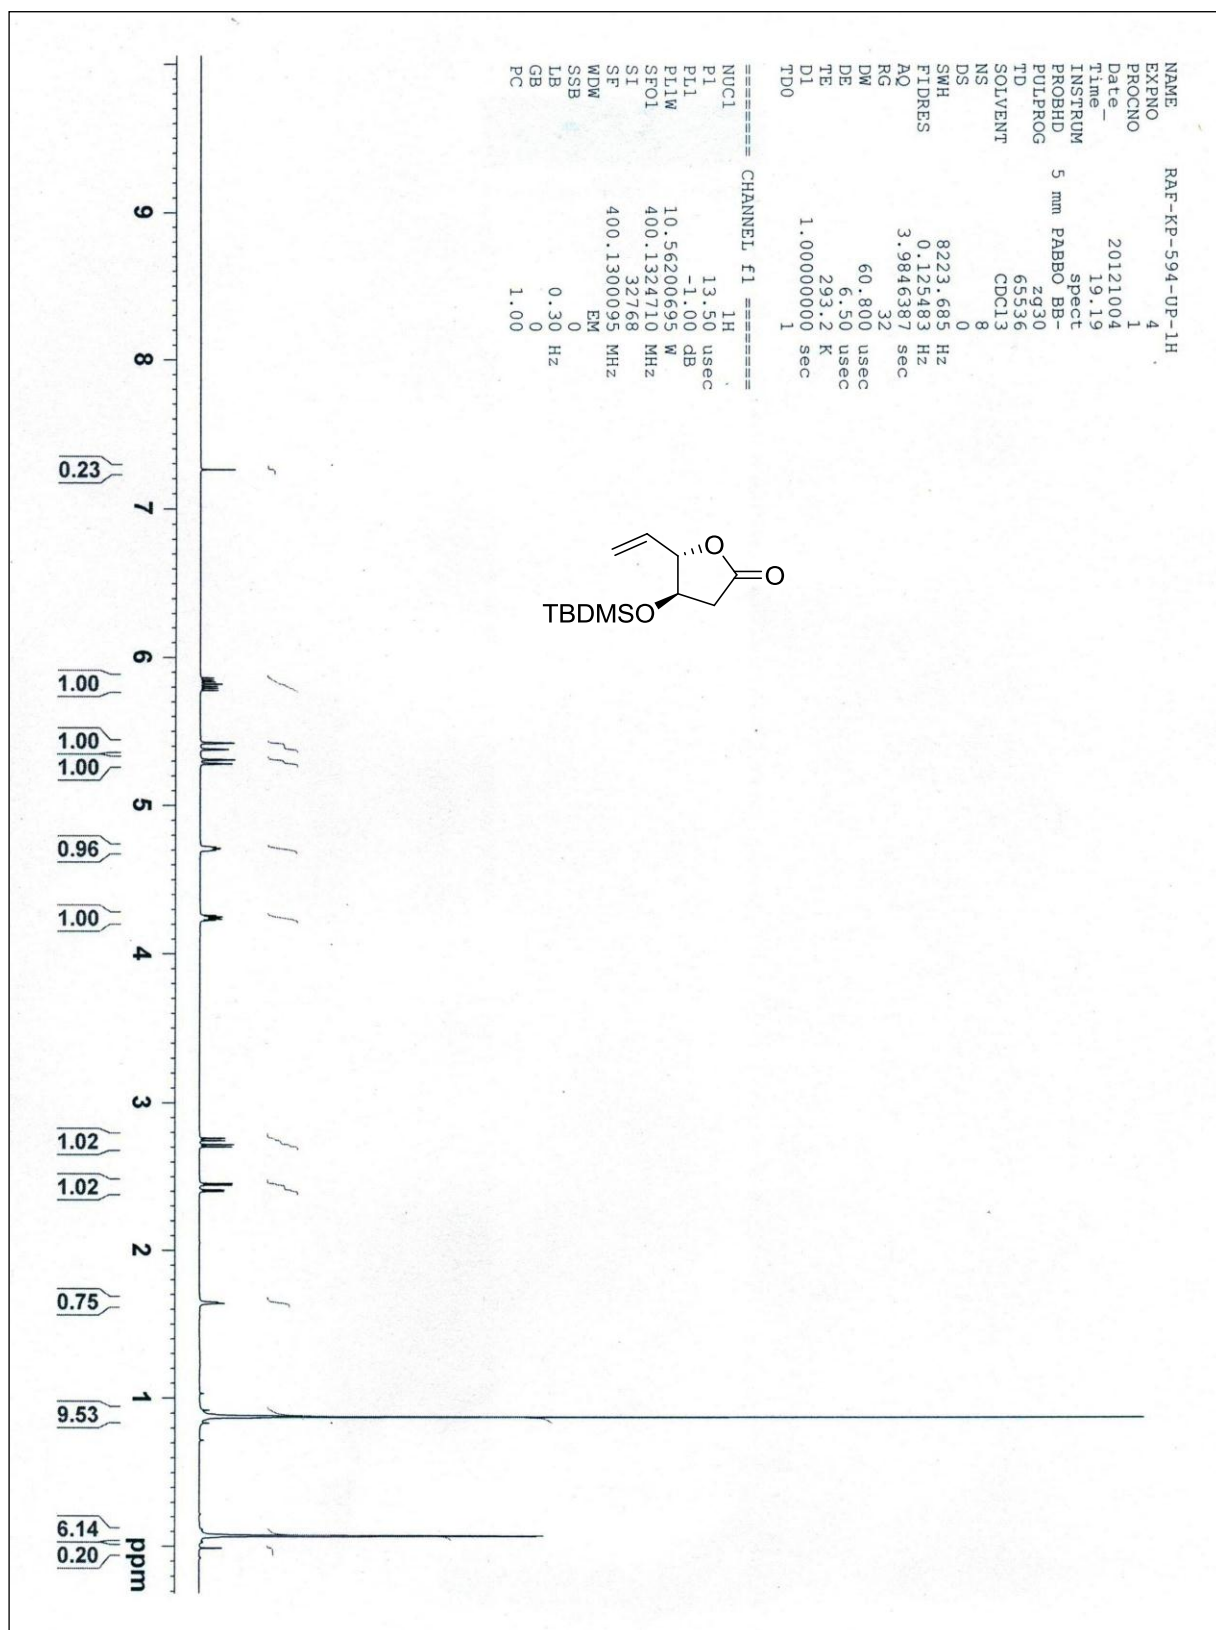

<sup>13</sup>C NMR (100 MHz, CDCl<sub>3</sub>) of Compound **1b**

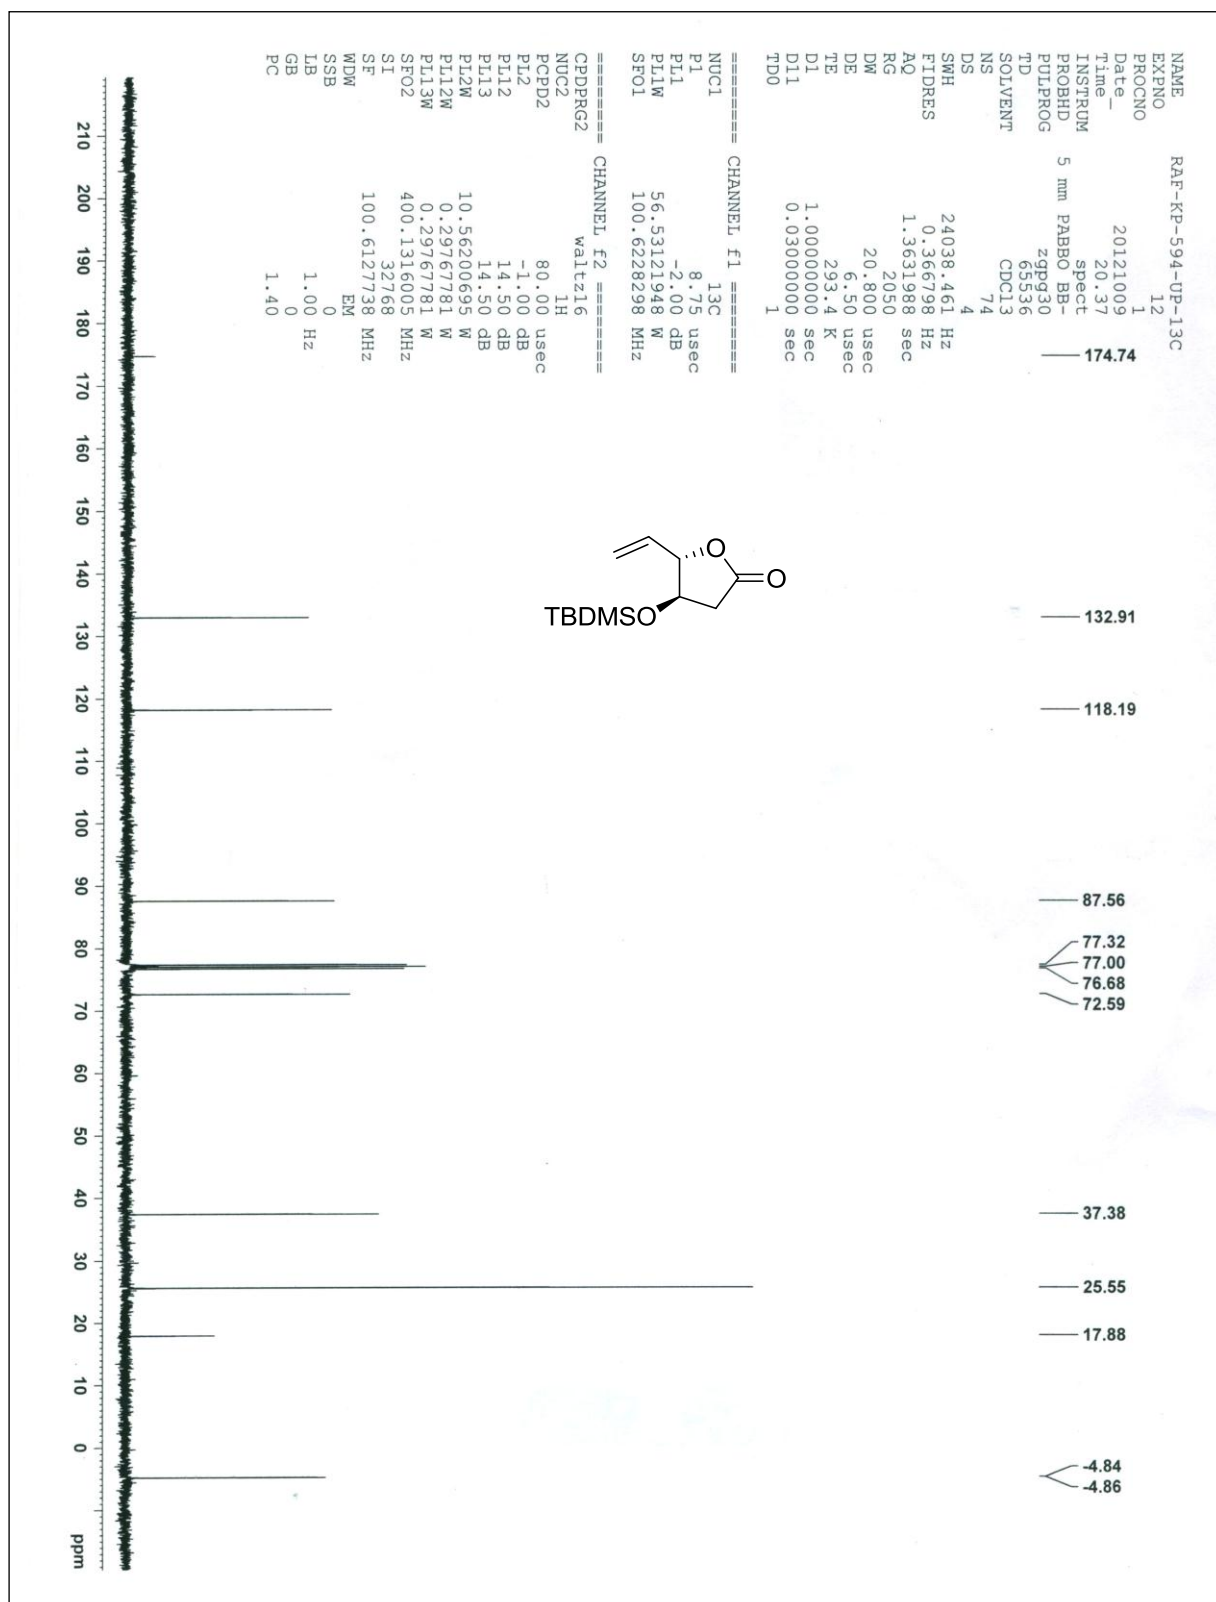

<sup>1</sup>H NMR (400 MHz, CDCl<sub>3</sub>/TMS) of Compound **2b**

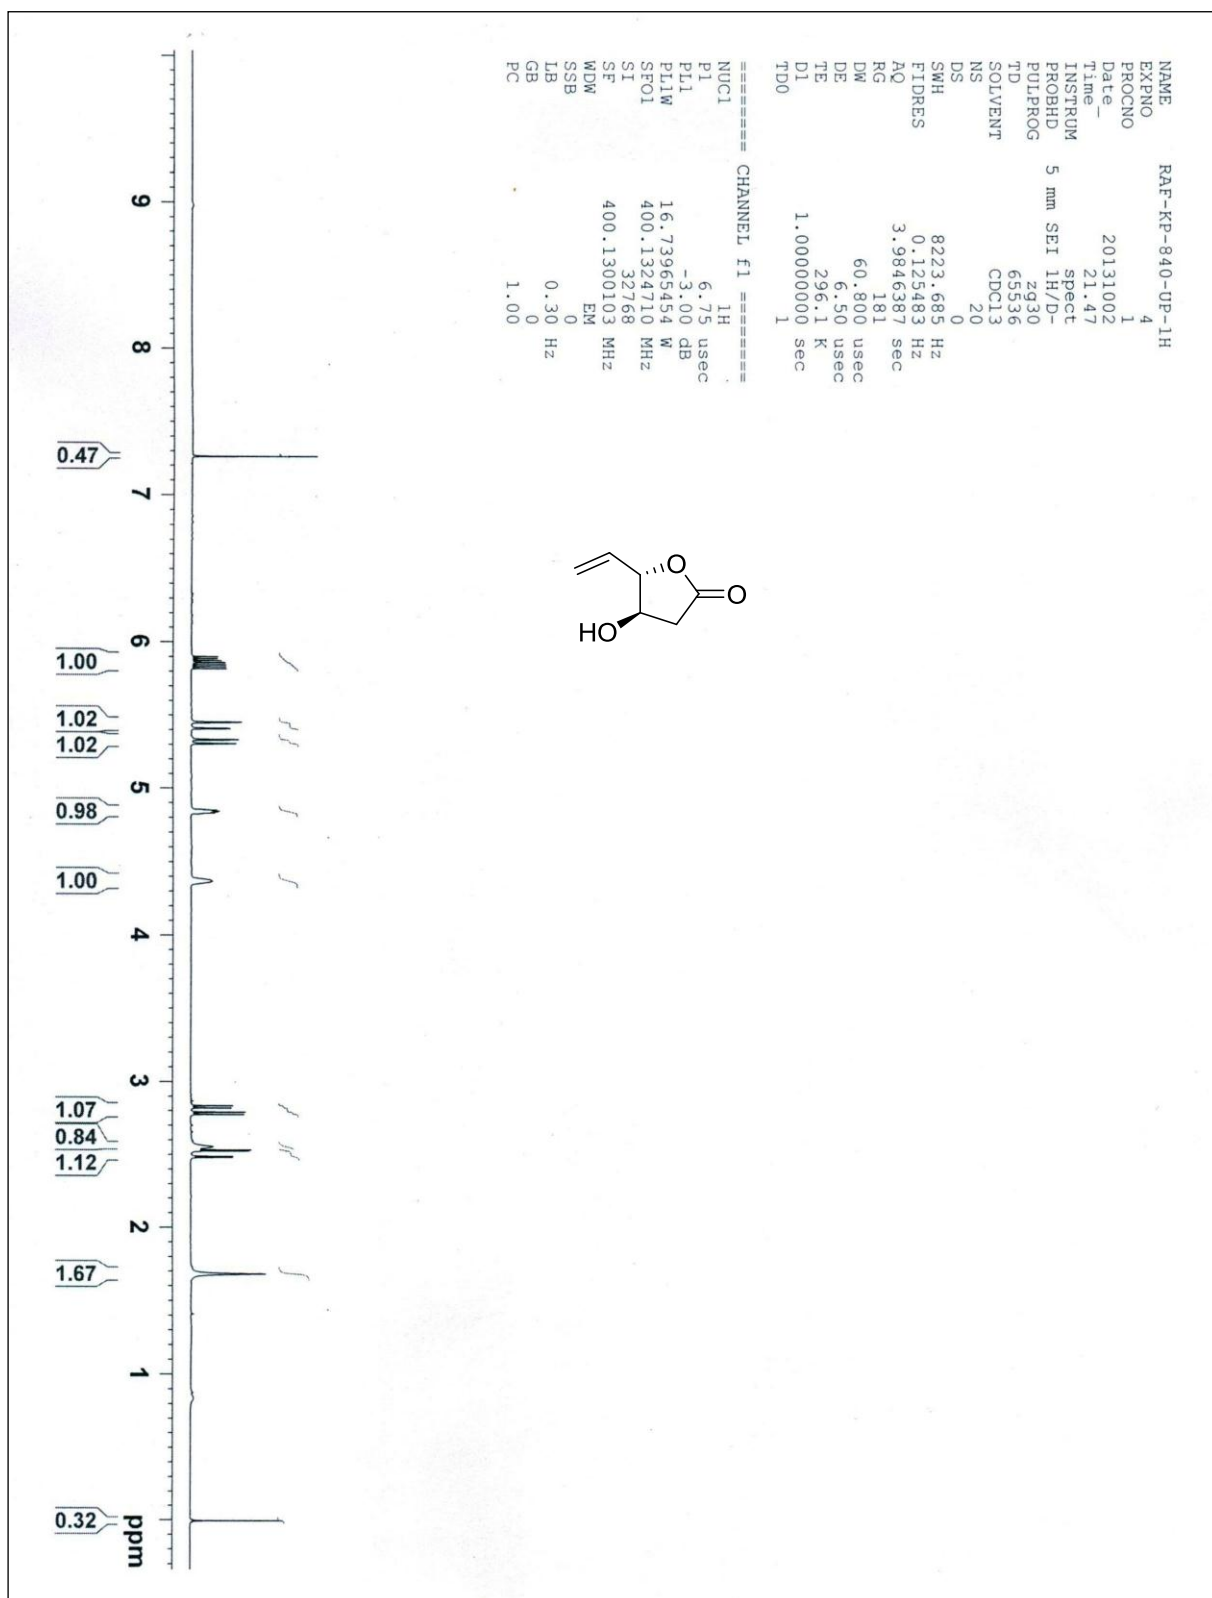



<sup>13</sup>C NMR (100 MHz, CDCl<sub>3</sub>) of Compound **2b**

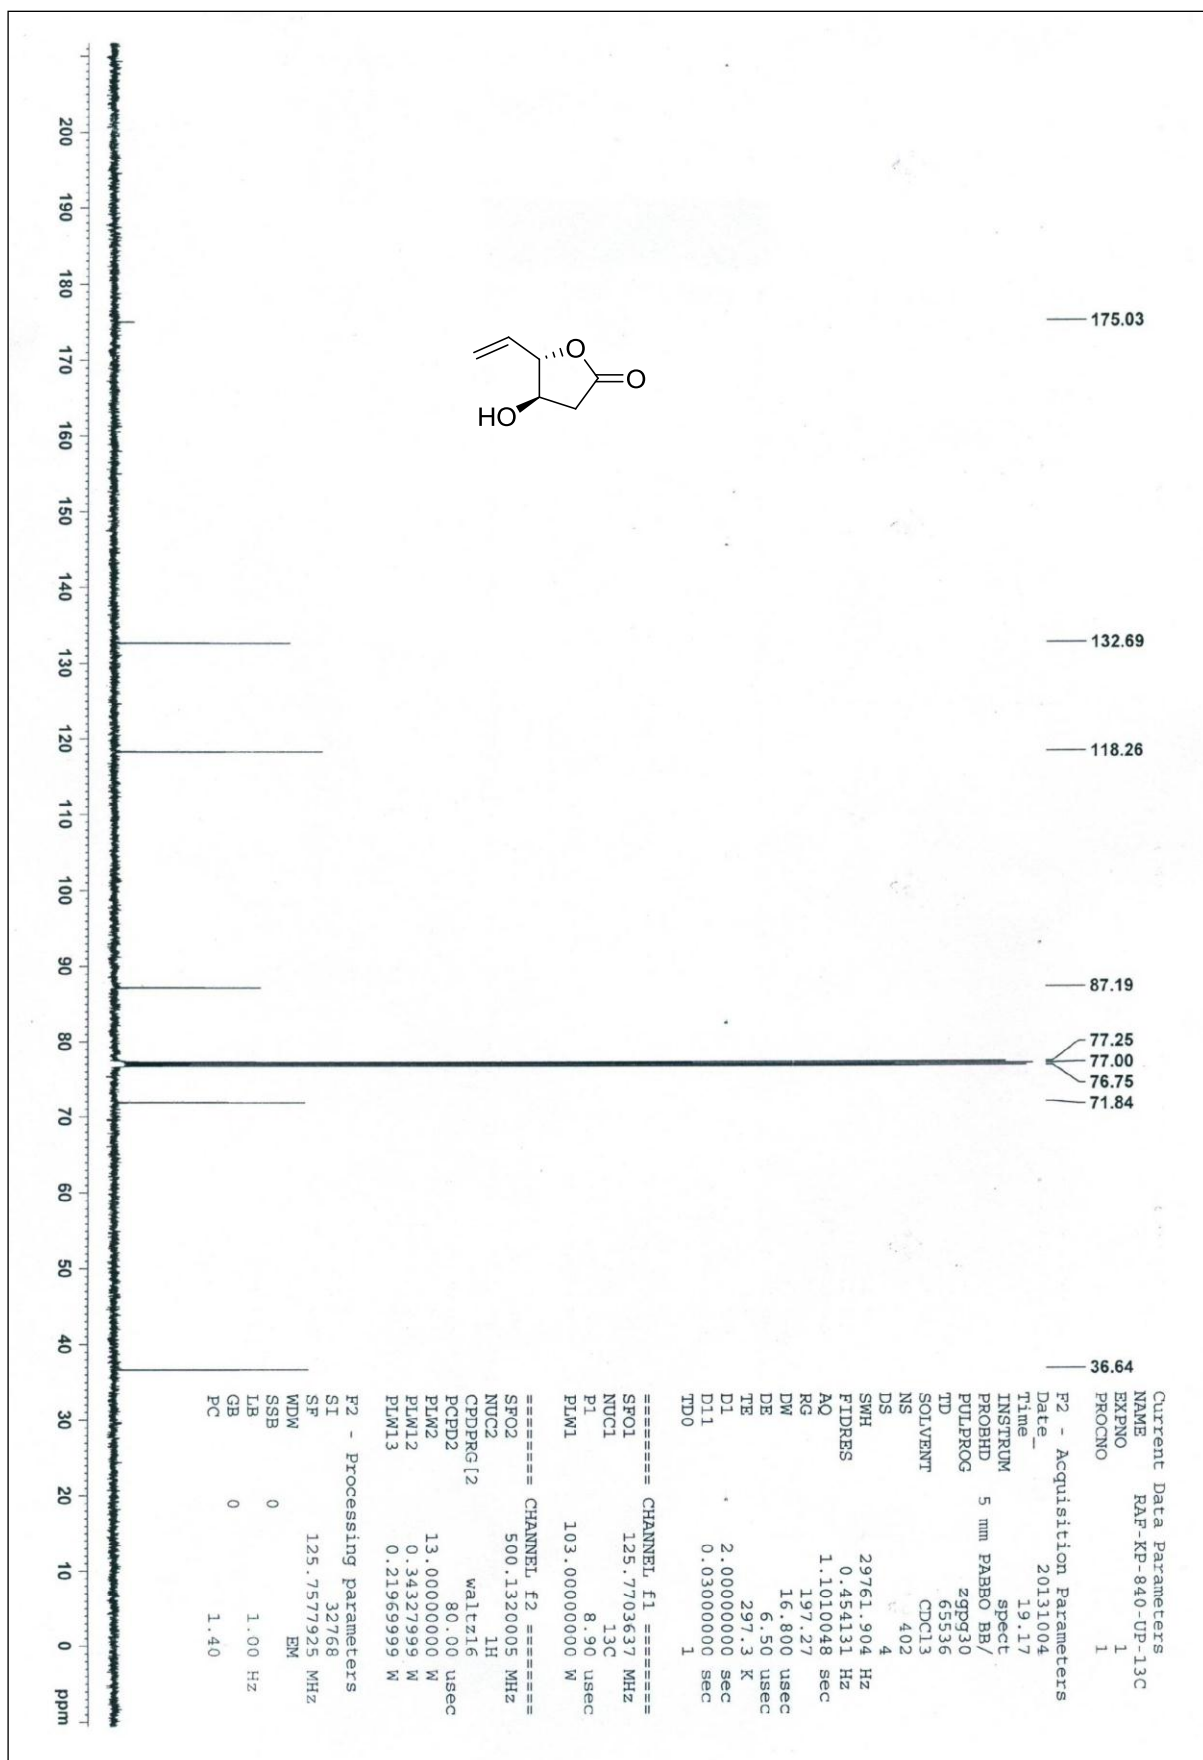

<sup>1</sup>H NMR (400 MHz, CDCl<sub>3</sub>/TMS) of Compound 7

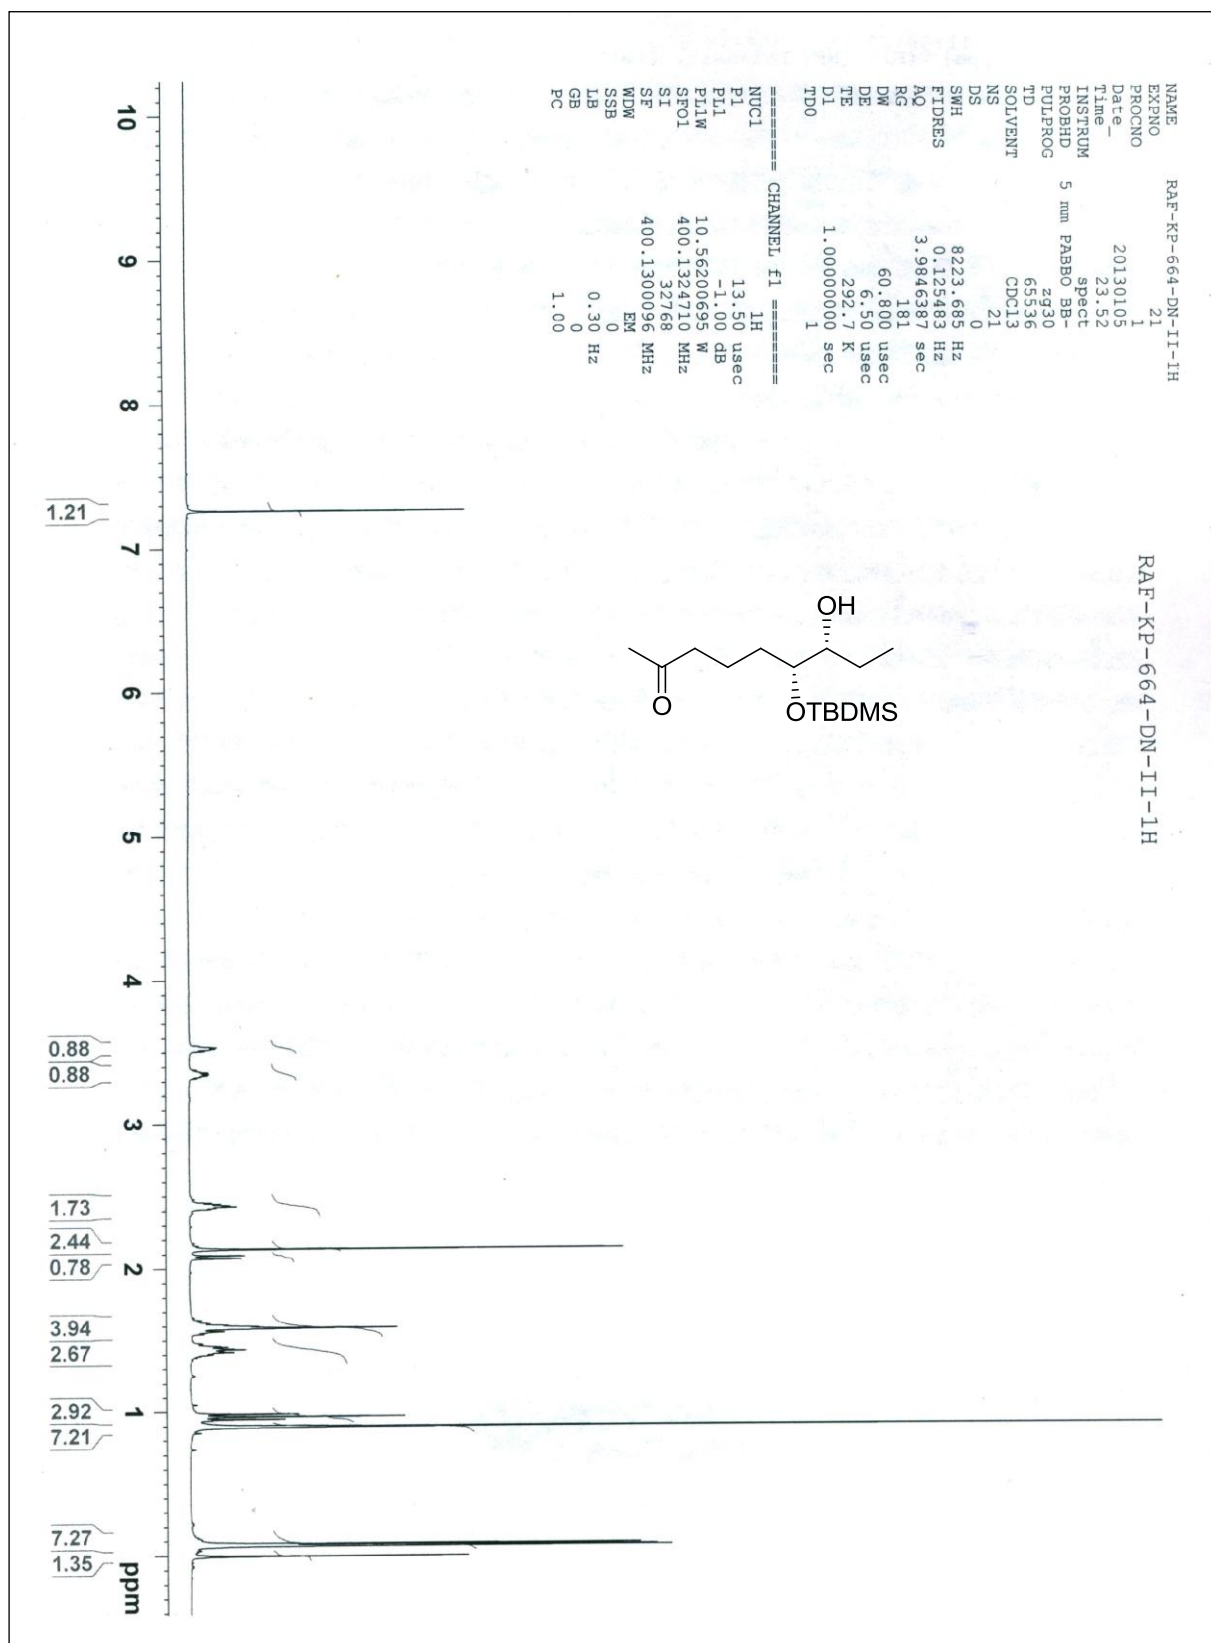

<sup>13</sup>C NMR (100 MHz, CDCl<sub>3</sub>) of Compound 7

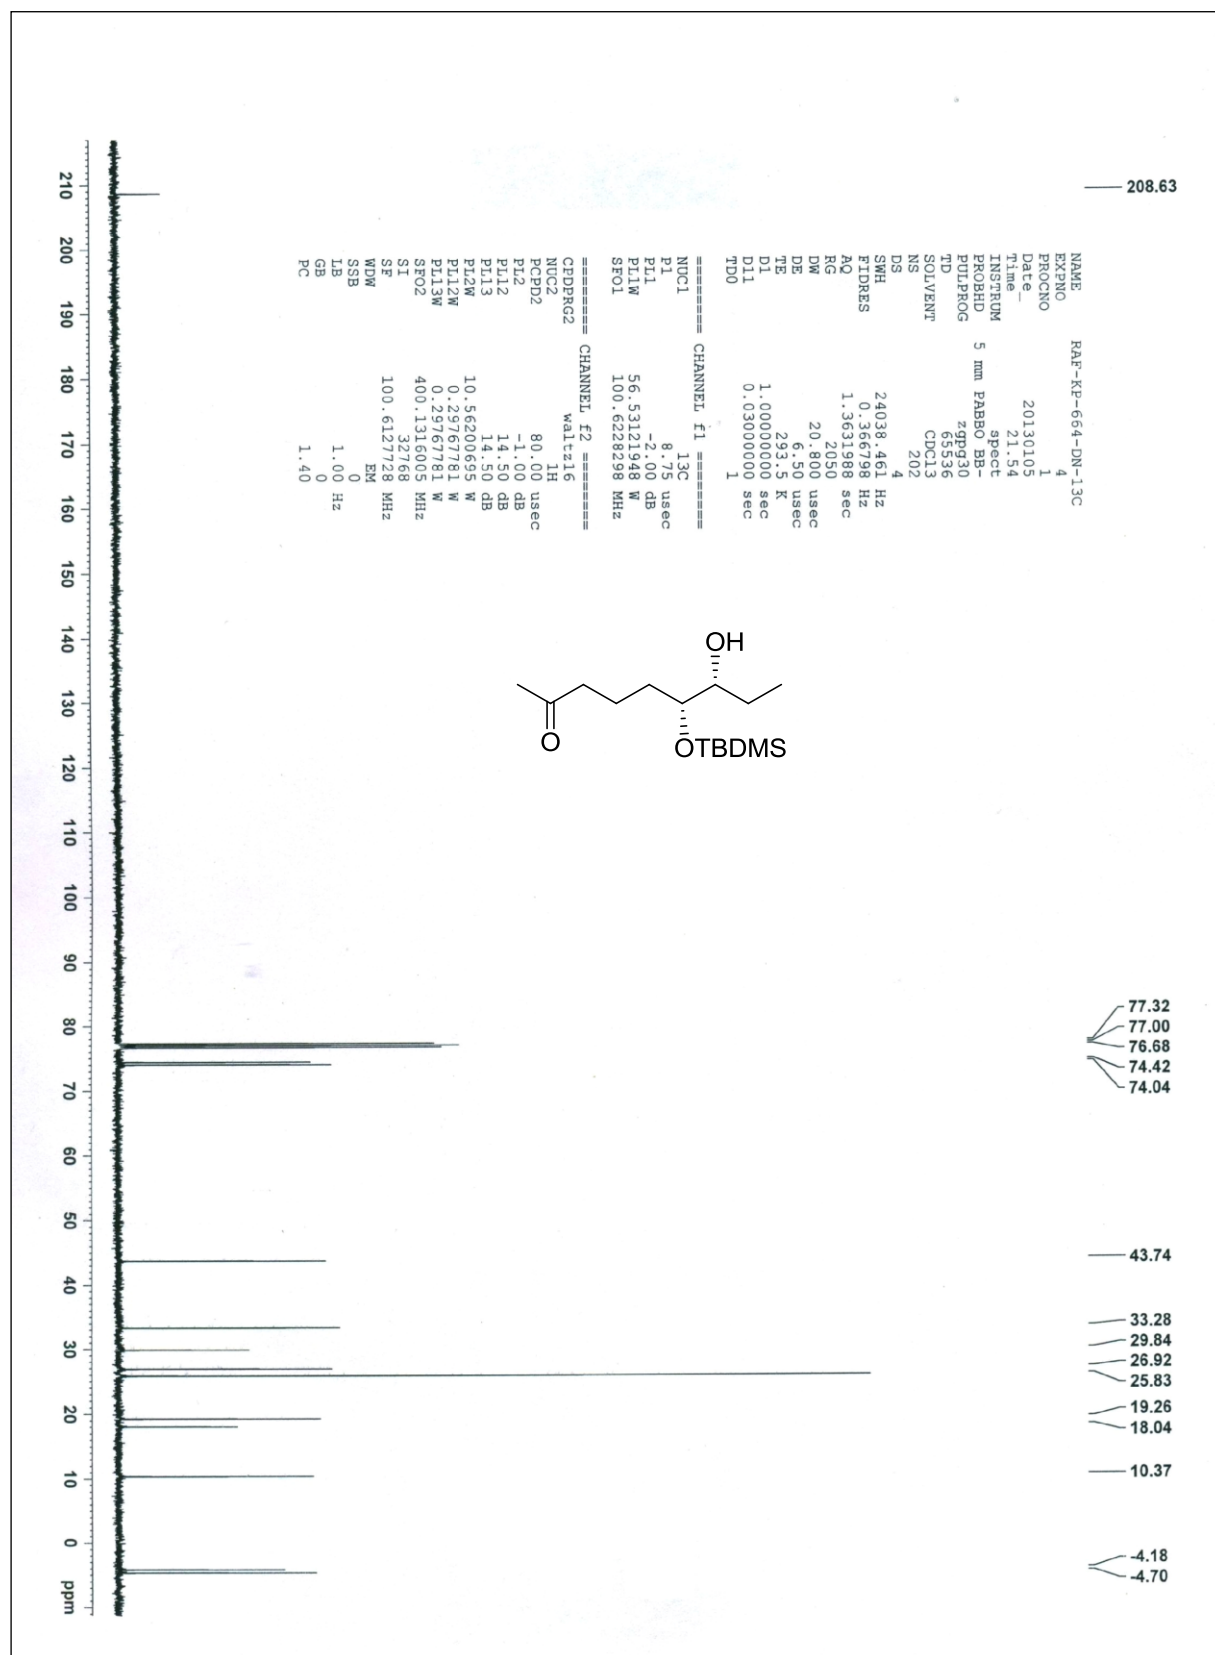

<sup>1</sup>H NMR (400 MHz, CDCl<sub>3</sub>/TMS) of Compound 9

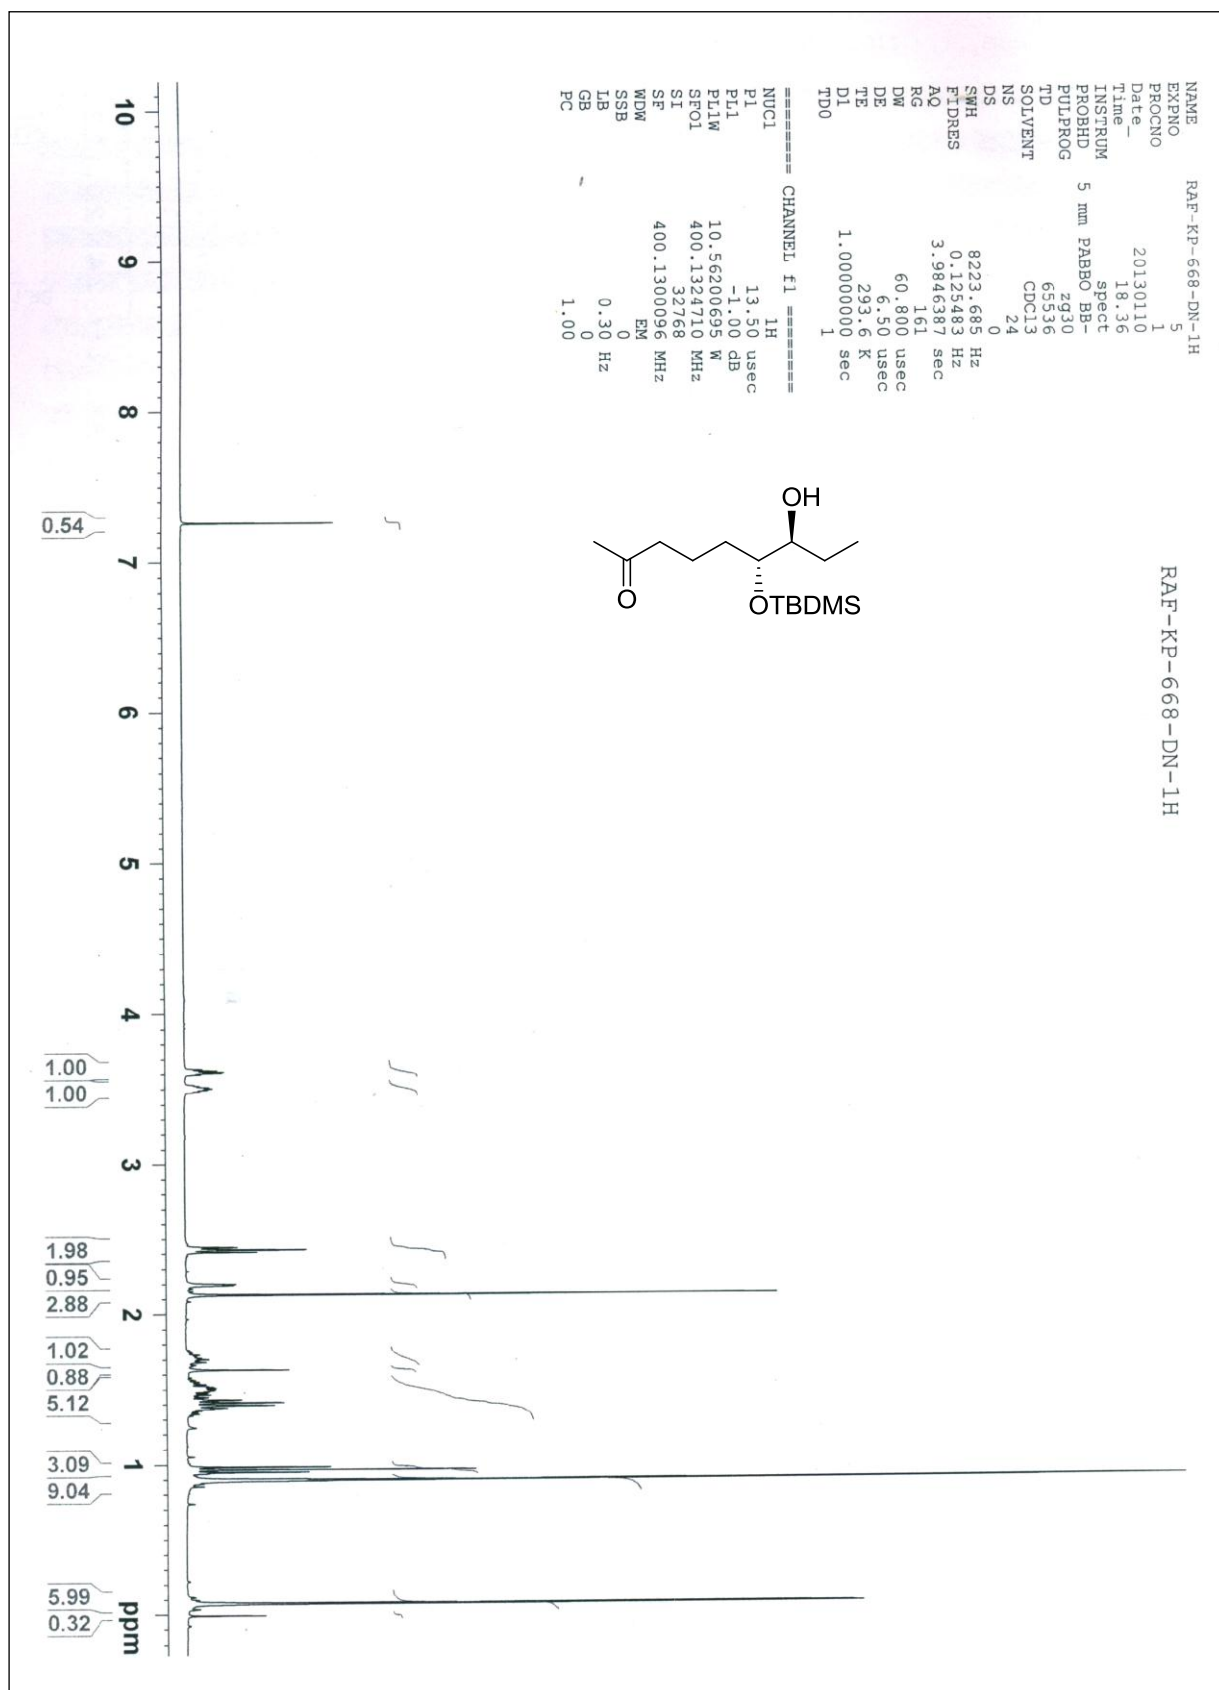

<sup>13</sup>C NMR (100 MHz, CDCl<sub>3</sub>) of Compound 9

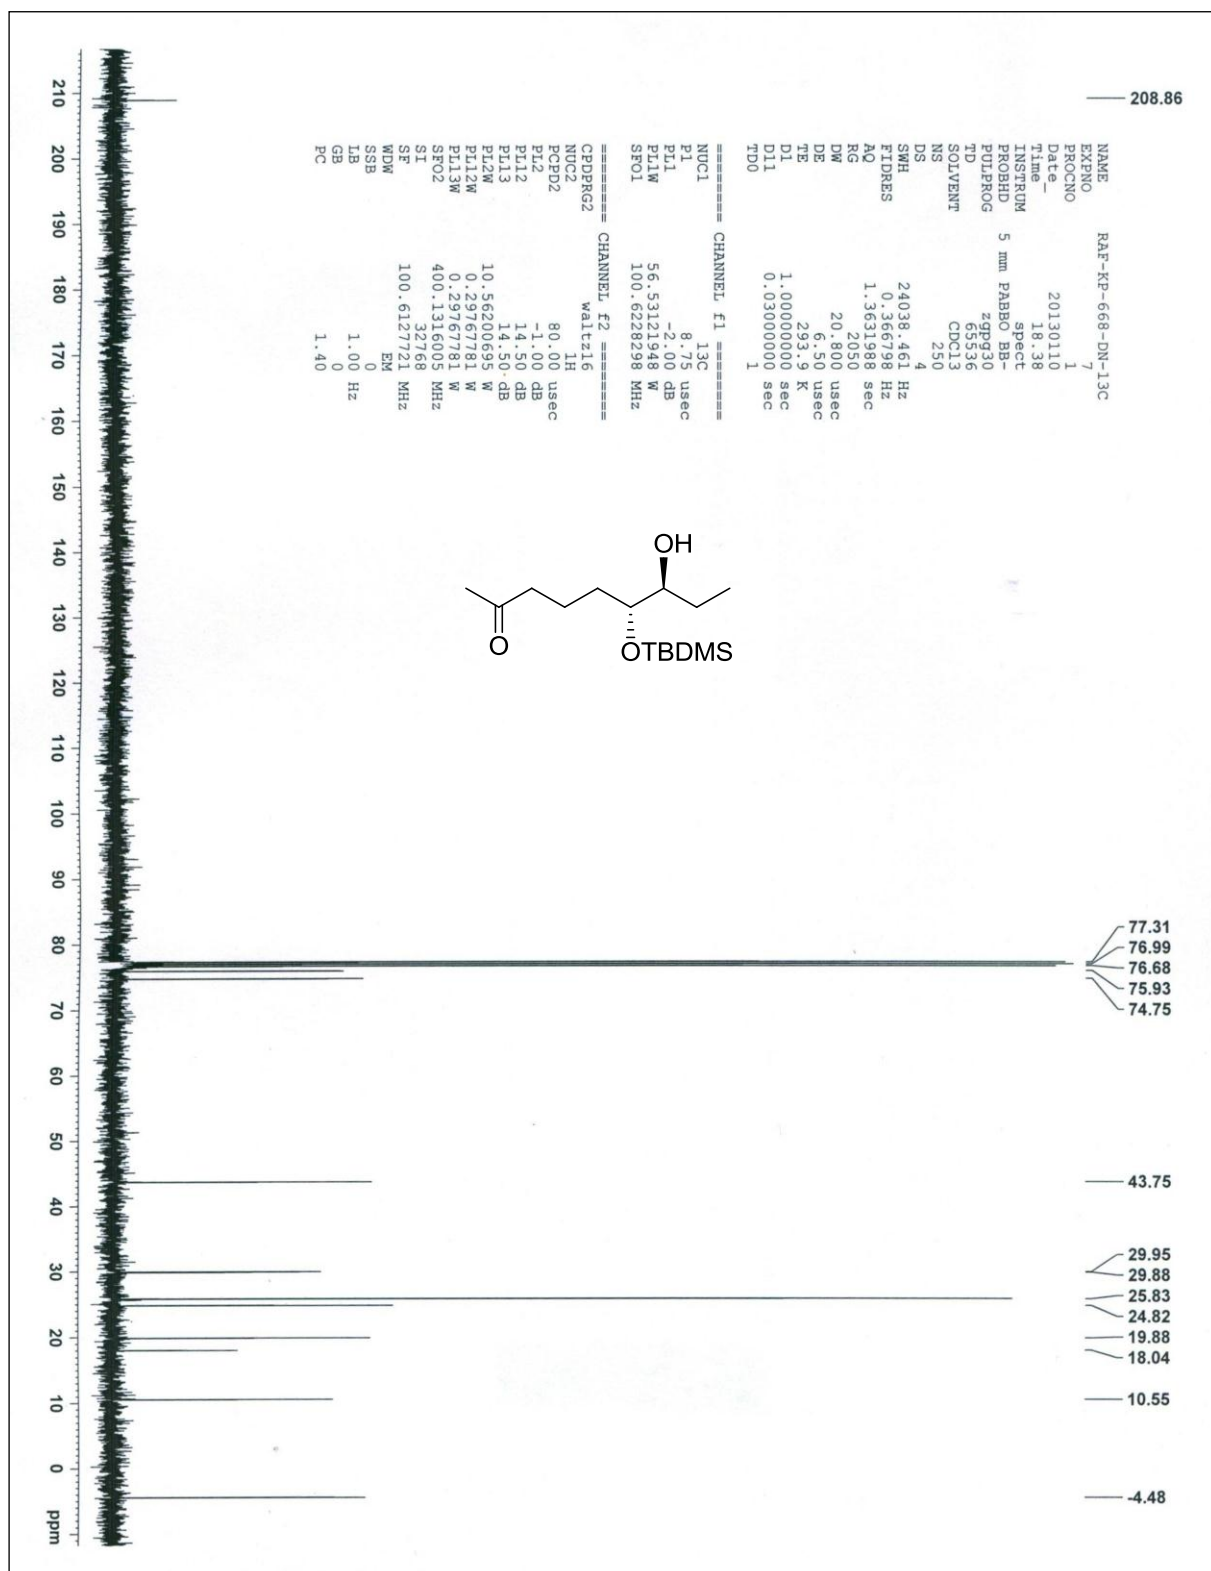

<sup>1</sup>H NMR (400 MHz, CDCl<sub>3</sub>/TMS) of (+)-*exo*-brevicomine (3)

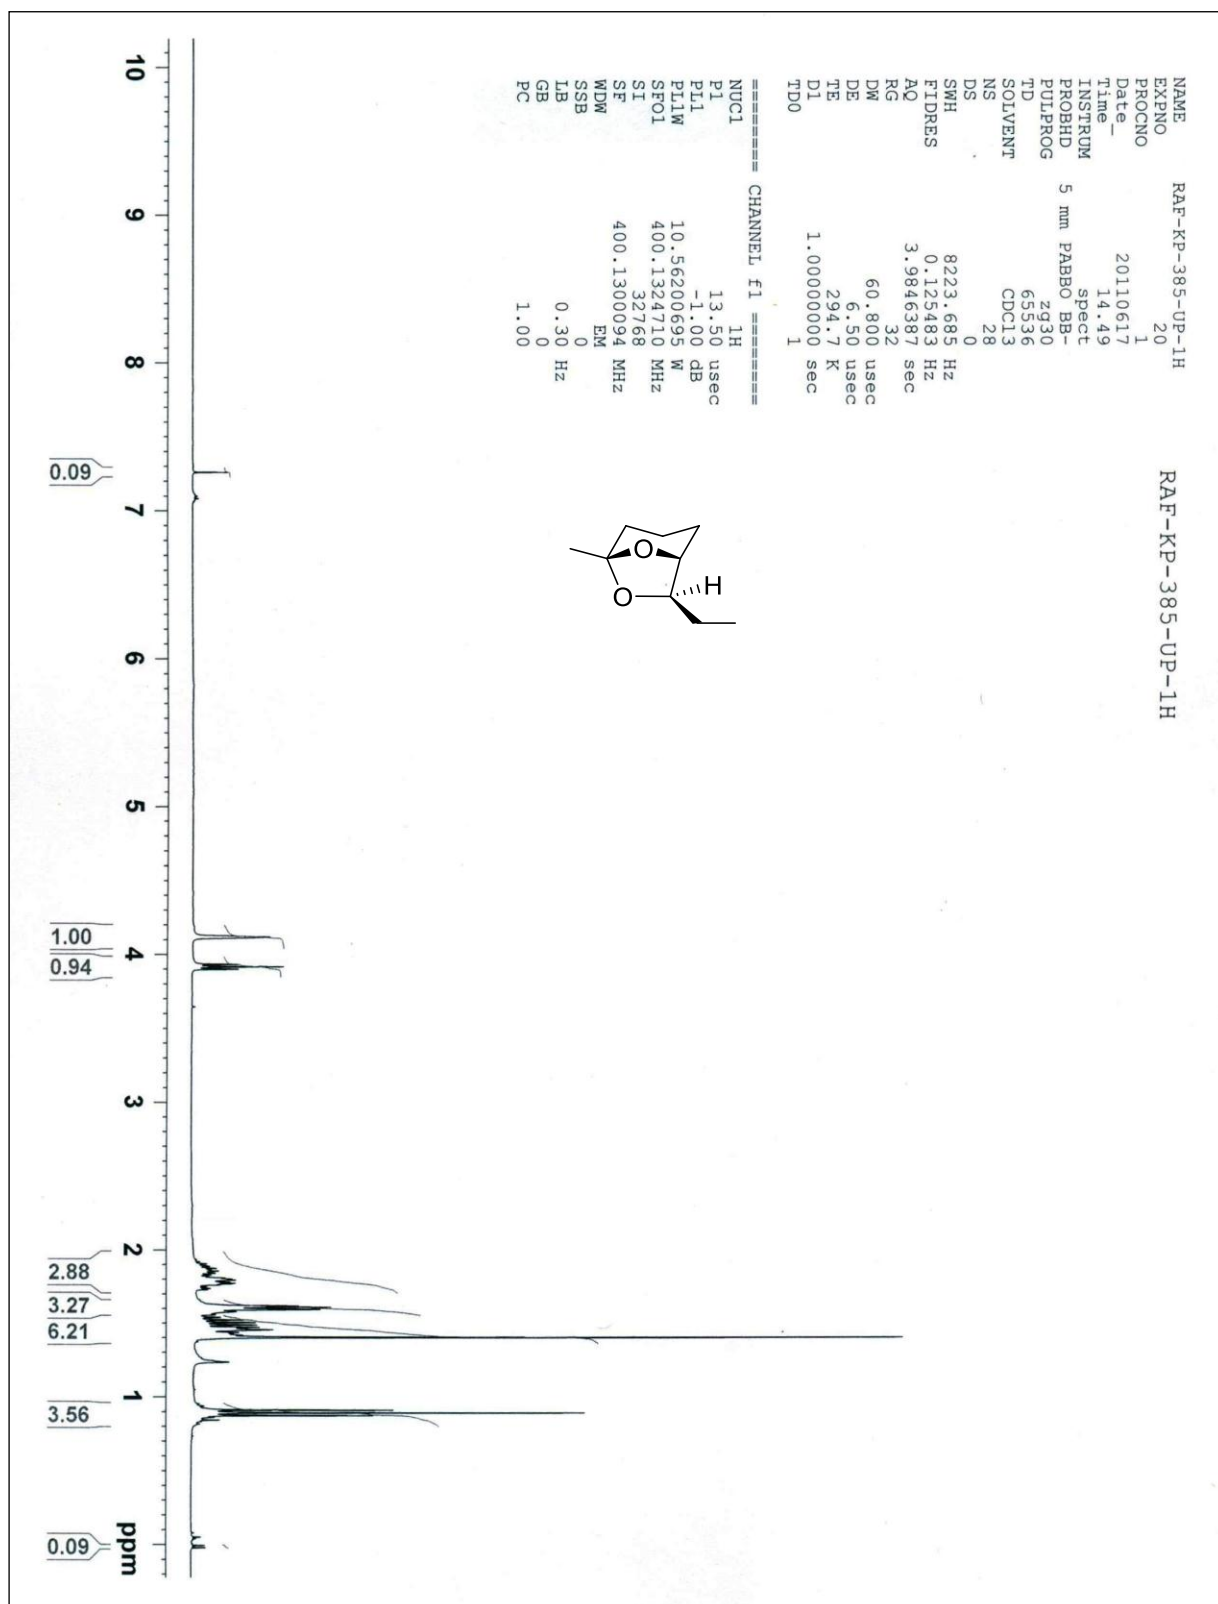

<sup>13</sup>C NMR (100 MHz, CDCl<sub>3</sub>) of (+)-*exo*-brevicomine (3)

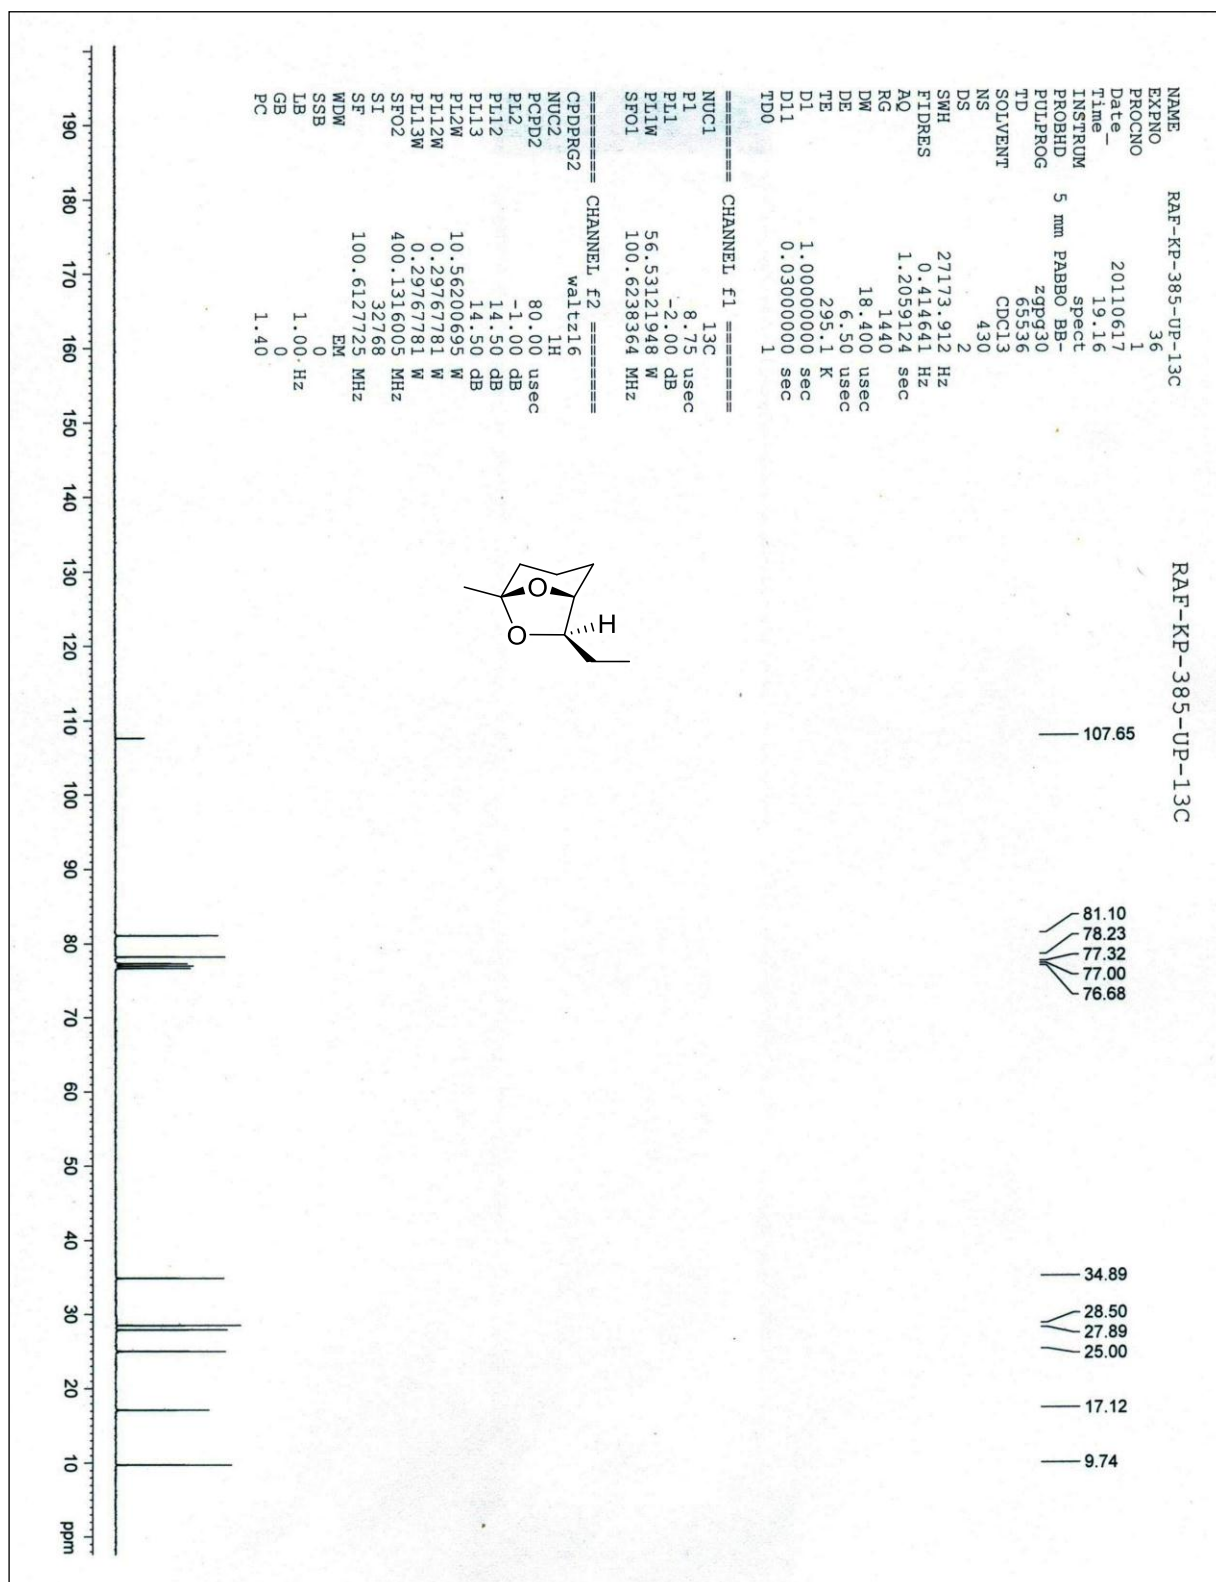

<sup>1</sup>H NMR (400 MHz, CDCl<sub>3</sub>/TMS) of (+)-*endo*-brevicomine (**4**)

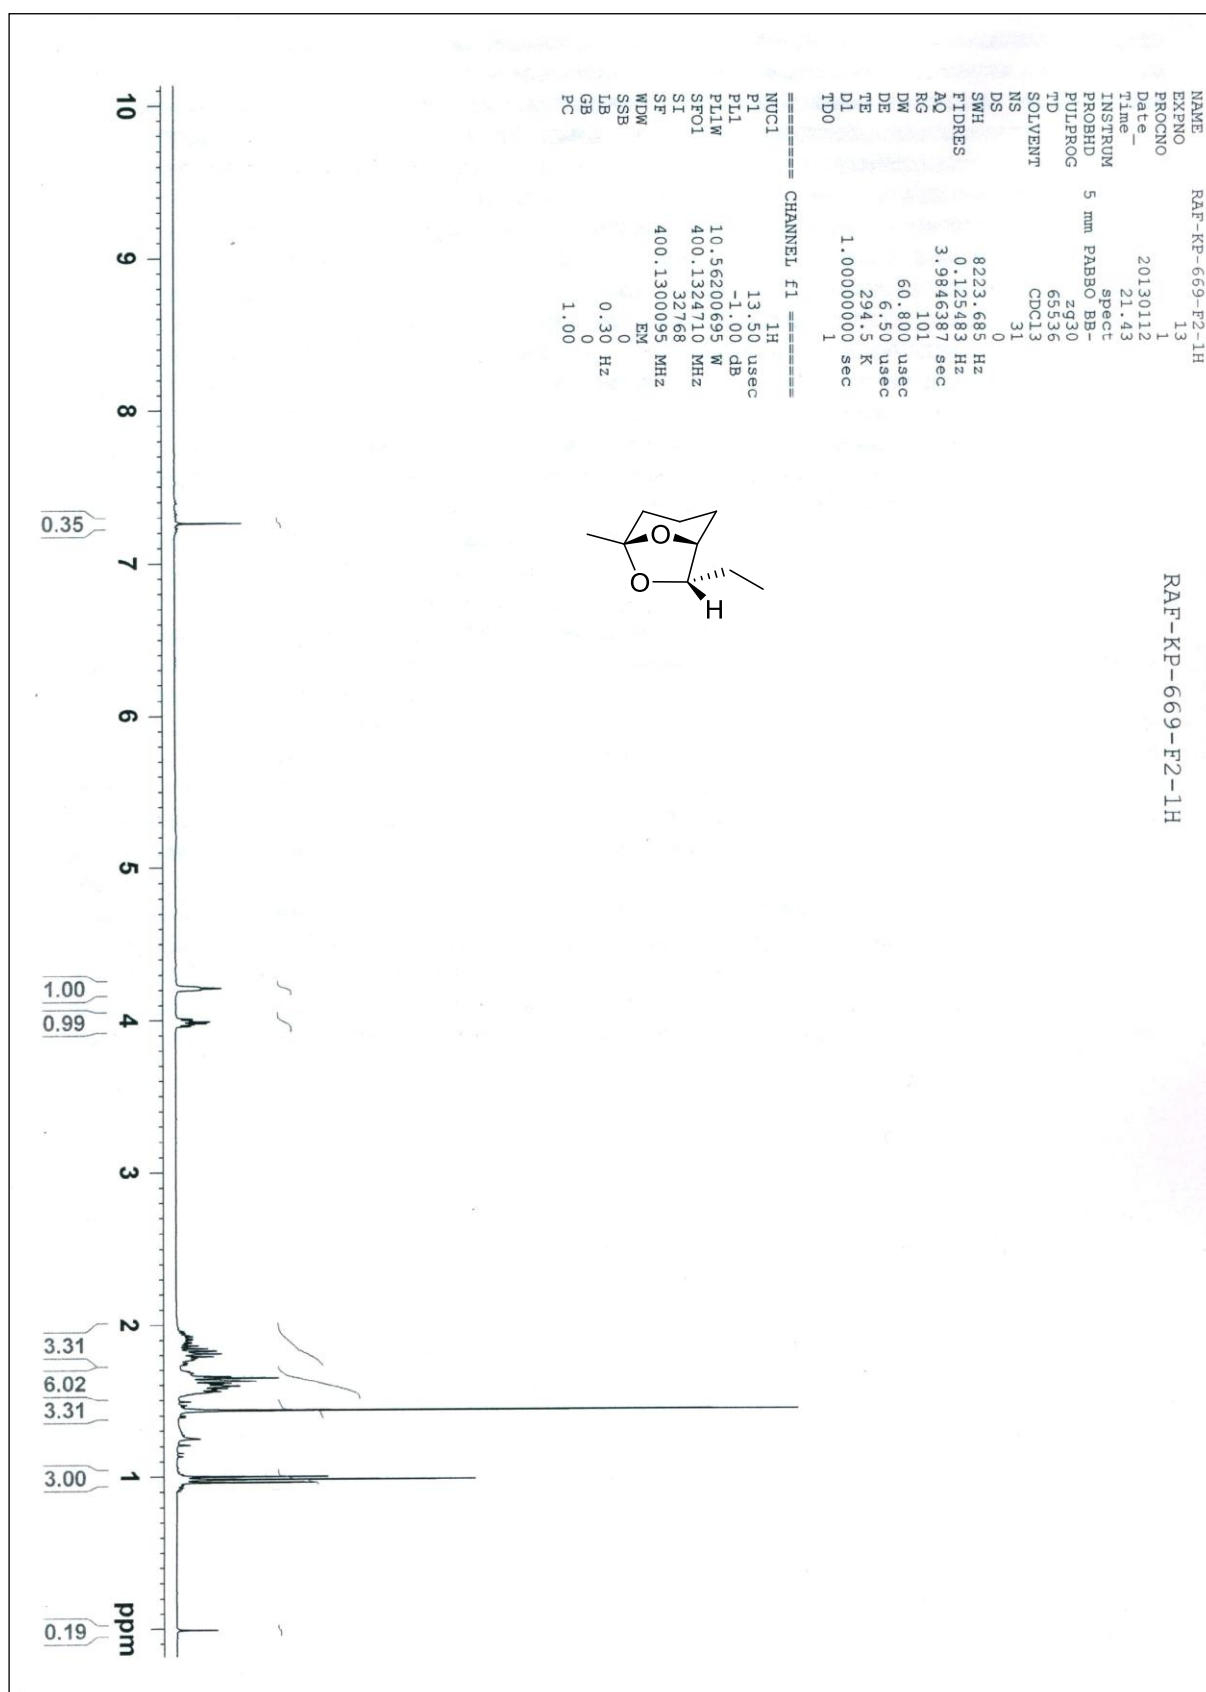



<sup>13</sup>C NMR (100 MHz, CDCl<sub>3</sub>) of (+)-*endo*-brevicomine (4)

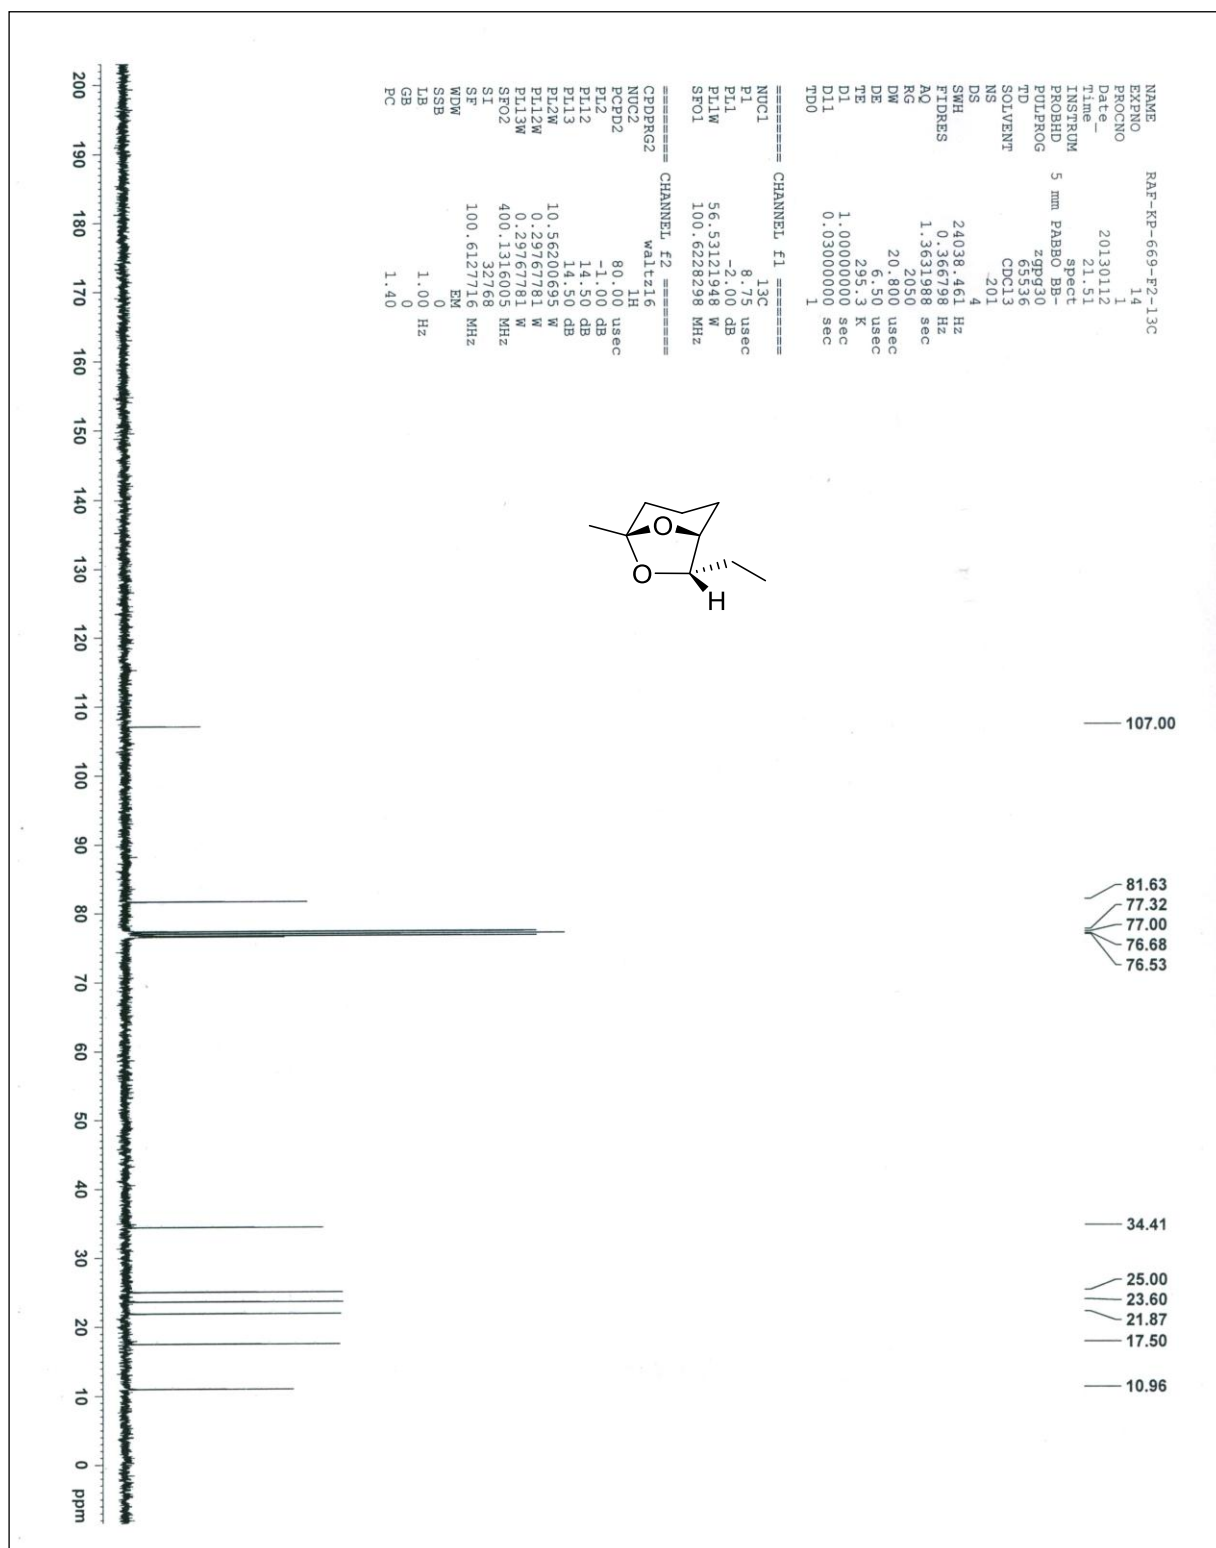

Supplement: c4ra00814f1.pdf [file c4ra00814f1.pdf]
